# Supplementary material for: Mg, Mn Coordination Synergy Enhancing SOD-like Activity and Fluorescence of Carbon Dot Nanozymes for Acute Liver Injury Therapy
Source: Research Square preprint supplement (doi:10.21203/rs.3.rs-8581646/v1), 2026-01-22
Supplement: Supplementary file 1 [file 14f1fe1e21cc7bea3750e50b.docx]

**Supplementary Information**

**Mg, Mn Coordination Synergy Enhancing SOD-like Activity and Fluorescence of Carbon Dot Nanozymes for Acute Liver Injury Therapy**

Xuejiao Wang,a Yu Zhang,b Jing Li,b Hongjing Cheng,c Hanyue Qiu,*,b Jian Jiao,*,a Cui Liu*,b

a Department of Digestive, China-Japan Union Hospital of Jilin University, Changchun 130033, P.R.China. E-mail: Jian jiao jjian@jlu.edu.cn

b Chongqing Key Laboratory of Natural Product Synthesis and Drug Research, Innovative Drug Research Center, School of Pharmaceutical Sciences, Chongqing University, Chongqing, 400044, P. R. China. E-mail: hanyue.qiu@cqu.edu.cn; liucui@cqu.edu.cn

c Department of Pathology, China-Japan Union Hospital of Jilin University, Changchun 130033, P.R.China

**Methods**

**Chemicals and materials**

Glutathione, formamide, and manganese(III) acetylacetonate were purchased from Shanghai Aladdin Biochemical Technology Co., Ltd. Magnesium chloride hexahydrate was purchased from Chengdu Kelong Chemical Co., Ltd. Terephthalic acid (TA) was purchased from Shanghai Titan Technology Co., Ltd. Acetaminophen was purchased from MedChemExpress LLC. SOD Assay Kit-WST (S311) was purchased from Dojindo Beijing Co., Ltd. ABTS Assay Kit (BC4775) was purchased from Beijing Solarbio Science & Technology Co., Ltd. MTT was purchased from Labgic Technology Co., Ltd. (Beijing, China). Annexin V-FITC Cell Apoptosis Detection Kit (C1062L), Mitochondrial Membrane Potential Detection Kit (JC-1) (C2006), Reactive Oxygen Species Detection Kit (S0033S), Total Glutathione Assay Kit (S0052), and Lipid Peroxidation (MDA) Assay Kit (S0131S) were purchased from Beyotime Biotechnology Co., Ltd (Shanghai, China). The primary antibodies against Bcl-2 (WL01556), Bax (WL01637), GAPDH (WL01114), and the secondary antibody (WLA023a) were purchased from Wanlei Bio (Shenyang, China). The primary antibodies against GPX-4 (F1580) and SLC7A11 (F0517) were purchased from Selleck Chemicals (China). ExonScript RT Mix (with dsDNase) and SYBRPrime qPCR Set were purchased from Baoguang Biotechnology Co., Ltd.

**Instrumentation**

The morphology of MgMn@CDs was acquired by a transmission electron microscope (FEI Tecnai G2 F20, USA). High-angle annular dark field (HAADF) and energy dispersive spectroscopy (EDS) were obtained by a special aberration corrected scanning transmission electron microscope (JEM-ARM300F, JEOL). The fluorescence emission spectra were recorded by the F-4600 (HITACHI, Japan). The UV-vis absorption spectra were obtained by an Ultraviolet-visible spectrophotometer (UH5300, HITACHI, Japan). The proton magnetic resonance (1H NMR) spectra were obtained by the 600 MHz nuclear magnetic resonance spectrometer (Agilent, Agilent Technologies, USA, D2O as the solvent). The Fourier transform infrared (FT-IR) spectra were recorded by the Bruker Tensor 27 (Bruker Corporation, USA). The fluorescence lifetime and absolute quantum yields were recorded by the FLS1000 (Edinburgh Instruments, UK). The X-ray photoelectron (XPS) spectra were obtained by the Thermo ESCALAB 250Xi (ThermoFisher Scientific, USA). The metal loading of metal-doped CDs was obtained by an inductively coupled plasma optical emission spectrometer (iCAP6300, ThermoFisher Scientific, USA). X-ray absorption spectroscopy (XAS) measurements of the Mg K-edge were obtained at I06 of Diamond Light Source (UK). X-ray absorption spectroscopy (XAS) measurements of the Mn K-edge were obtained at B18 of Diamond Light Source (UK). The absorbance values were obtained using the SpectraMax i3x microplate reader (Molecular Devices, USA). Flow cytometry data were acquired through the CytoFLEX analytical flow cytometer (Beckman Coulter, USA). Cellular fluorescence images were acquired by the inverted fluorescence microscope (Nikon, Ti-S, Japan). Histological slides were imaged by the upright fluorescence microscope (Leica DM6, Leica, Germany). Protein imaging was performed using the Bio-Rad ChemiDoc Touch chemiluminescence imaging system (Bio-Rad Laboratories, USA). Real-time fluorescent quantitative PCR was performed using the CFX96 Touch (Bio-Rad Laboratories, USA). Fluorescence imaging in mice was obtained using the In Vivo Small Animal Optical Imaging System (IVIS Lumina III, PerkinElmer, USA).

**Synthesis of MgMn@CDs**

MgMn@CDs were synthesized using a one-step solvothermal method, according to our previous work.1 Briefly, 20 mg of magnesium chloride hexahydrate, 10 mg of manganese (III) acetylacetonate, along with 0.7 g of reduced glutathione were added to 70 mL of formamide. The mixture was transferred into a Teflon autoclave and reacted at 160 ℃ for 8 h. The resulting solution was cooled to room temperature and dialyzed for 7 days using a 3500-Da dialysis bag. The solution was concentrated and then freeze-dried to obtain MgMn@CDs. CDs without metal doping were prepared by the same method without adding metal salts. Similarly, Mg-CDs were prepared by adding 20 mg of magnesium chloride hexahydrate, while Mn-CDs were prepared by adding 10 mg of manganese (III) acetylacetonate.

**SOD-like activity and O2•− scavenging activity of MgMn@CDs**

The SOD-like activity of MgMn@CDs was detected using a commercial SOD Assay Kit (S311, Dojindo Molecular Technolo gies, Inc.). In the reaction system, xanthine oxidase (XO) continuously generates O2•−, which can reduce the WST-1 ((2-(4-Iodophenyl)-3-(4-nitrophenyl)-5-(2,4-disulfophenyl)-2H-tetrazolium, monosodium salt)) to form formazan dye with strong absorption at 450 nm. When SOD or its mimetics are added to this system, it competes with WST-1 to react with O2•−, thereby inhibiting the formation of formazan and resulting in a decrease in the final absorbance. The inhibition rate of SOD (%) was calculated according to the following equation. Additionally, the O2•− scavenging capacity of MgMn@CDs can be evaluated by monitoring the change in UV-vis absorption intensity of the reaction system at approximately 450 nm before and after the addition of MgMn@CDs.

The inhibition rate of SOD (%) =

Control 1: coloring without inhibitor, Control 2: sample blank, Control 3: reagent blank.

**•OH scavenging activity of MgMn@CDs**

The generation of ⋅OH is achieved by irradiating H₂O₂ under ultraviolet light. Terephthalic acid (TA) is used as a probe and reacts with ⋅OH to form 2-hydroxyterephthalic acid, which exhibits a characteristic fluorescence peak at approximately 430 nm. The ⋅OH scavenging capacity of MgMn@CDs can be evaluated by comparing the variation in fluorescence intensity around 430 nm before and after the addition of MgMn@CDs. 2 mM H₂O₂, 5 mM TA, and MgMn@CDs at different concentrations (0, 10, 20, and 40 μg/mL) were mixed and irradiated under UV light for 15 min. Subsequently, the changes in fluorescence emission spectra of different groups were recorded.

**ABTS****•+ scavenging activity of MgMn@CDs**

The ABTS•+ scavenging capacity of MgMn@CDs was determined using a commercial assay kit (BC4775, Beijing Solarbio Science & Technology Co., Ltd.). ABTS is oxidized to form stable blue-green ABTS**•+**, which exhibits a characteristic absorption at 405 nm. When antioxidant samples are added, they react with ABTS**•+**, resulting in the discoloration of the reaction system and a decrease in absorbance. The ABTS**•+** scavenging capacity of MgMn@CDs can be evaluated by measuring the degree of absorbance decrease.

***In vitro* cytotoxicity study**

The cytotoxicity of MgMn@CDs was evaluated using the MTT assay. AML-12 cells were seeded into 96-well culture plates at a density of 1 × 104 cells per well and cultured at 37 °C for 24 h. Subsequently, cells were treated with different concentrations of MgMn@CDs for 24 h. After the cells were incubated with 5 mg/mL MTT for another 4 h, the suspension was discarded and the dark blue crystals (formazan) were dissolved in DMSO. Then, the absorbance at 490 nm was measured using a Spectramax microplate reader. In all experiments, three replicate wells were used for each drug concentration. Each assay was performed at least three times.

**ROS measurement**

AML-12 cells were seeded into a 6-well culture plate at a density of 2 × 105 cells per well. After treatment, intracellular production of ROS was detected based on the oxidation of the cell-permeable dye 2*'*,7*'*-dichlorofluorescin diacetate (DCFH-DA). DCFH-DA was prepared by diluting it in serum-free culture medium at a 1:1000 ratio. Subsequently, the diluted DCFH-DA solution (10 μM) was added to each well and incubated for 30 min at 37 °C. After incubation, the cells were washed three times with PBS. ROS generation was visually assessed using a fluorescence microscope.

**Mitochondrial membrane potential evaluation**

Mitochondrial transmembrane potential (∆Ψm) was detected using a JC-1 mitochondrial membrane potential assay kit. After the treatment, the cells were incubated at 37 °C for 20 min with 5 μg/mL JC-1 (5,5,6,6-tetrachloro-1,1,3,3-tetraethylbenzimidazolylcarbocyanine iodide), and then washed three times with PBS and placed in fresh serum-free medium. Samples were visually assessed using a fluorescence microscope.

**Detection of apoptosis**

AML-12 cells in the logarithmic growth phase were seeded in a 6-well plate at a density of 2 × 105 per well. After 24 h of treatment, the cells were trypsinized, washed three times with PBS and centrifuged at 2000 rpm for 5 min. The precipitated cells were carefully suspended in 500 μL of staining solution (containing 5 μL AnnexinV-FITC and 5 μL PI in Binding Buffer), mixed gently and incubated for 15 min at room temperature in the dark. Cells were then analyzed using a FACSCalibur flow cytometer.

***In vivo* biocompatibility evaluation**

To assess the biocompatibility of MgMn@CDs *in vivo*, ICR mice aged 6-8 weeks were intraperitoneally administered with MgMn@CDs at a single dose of 20 mg/kg (n=6). A control group received an intraperitoneal injection of saline. Blood samples were collected from the mice at 30 days post-injection for serum biochemistry testing, including the measurement of a panel of hepatic and renal function markers. Subsequently, the mice were sacrificed, and major organs, including the heart, liver, spleen, lung, and kidney, were harvested for H&E staining.

**Imaging of** **MgMn@CDs in mice *in vivo* and *ex vivo***

The abdomens of ICR mice were depilated. Then, MgMn@CDs (10 mg/kg) were injected intraperitoneally into the mice. Control group received MgMn@CDs in saline, while experimental group received MgMn@CDs with APAP. *In vivo* imaging was performed at each time point. For *ex vivo* imaging, at the specific time point after treatment, the mice were humanely sacrificed. Subsequently, the major organs, namely the heart, liver, spleen, lung, and kidney, were carefully isolated and immediately subjected to *ex vivo* imaging to precisely examine the distribution and accumulation of MgMn@CDs.

**Animal model**

After a 7-day acclimation period, the mice were randomly divided into six groups: a normal control group, an APAP-induced acute liver injury model group, a positive control group (NAC, 150 mg/kg), and three treatment groups that receiving MgMn@CDs at 5, 10, or 20 mg/kg. All mice were fasted overnight. Two hours prior to APAP challenge, the positive control group was administered NAC (150 mg/kg, i.p.), and the treatment groups received MgMn@CDs (5, 10, or 20 mg/kg, i.p.), while the normal control and model groups were given saline vehicle. Subsequently, mice in the model, positive control, and treatment groups received an intraperitoneal injection of APAP (300 mg/kg) to induce liver injury; the normal control group received an equivalent volume of saline. Blood samples were collected from the mice 24 hours after APAP exposure for serum biochemistry testing, including the measurement of hepatic markers (AST and ALT). Finally, the mice were euthanized, and liver tissues were harvested for further analysis.

**Transmission electron microscopy**

Liver tissues were collected from euthanized mice and cut into small cubes. Tissues were fixed in 2.5% glutaraldehyde in 0.1 M phosphate buffer at 4 ℃, then post-fixed with 1% OsO₄ for 1 h at room temperature. After dehydration with graded ethanol solutions, tissues were embedded in epoxy resin. Ultrathin sections (70 nm) were cut, stained with lead citrate and uranyl acetate, and imaged using a Hitachi H-7650 TEM (100 kV). The experiment was repeated three times with consistent results.

**Western blotting**

Cells in 6-well plates were rinsed twice with cold PBS and lysed in RIPA lysis buffer containing a protease inhibitor (PMSF) at a 1:100 dilution on ice for 30 min. Insoluble debris was removed by centrifugation (4 ℃, 12000 × g, 10 min), and protein concentrations were measured using a Pierce BCA protein assay kit. Proteins were separated by sodium dodecyl sulfate-polyacrylamide gel electrophoresis (SDS-PAGE) and transferred onto polyvinylidene difluoride (PVDF) membranes. Membranes were blocked with 5% skim milk in TBST, incubated with primary antibodies overnight at 4 ℃, washed five times with TBST (5 min each), and then incubated with HRP-conjugated goat anti-rabbit IgG for 1 h at room temperature. Bands were detected using an ECL kit and imaged on a ChemiDoc system.

**RNA extraction and qRT-PCR analysis**

Liver cells or tissue were mixed and ground in TRIzol (1 mL). After standing for 5 min, chloroform was added to the sample, shaken, and kept for 5 min. After centrifugation at 12,000 × g at 4 °C for 15 min, the supernatant was transferred into a new tube. Then, isopropanol was added, followed by gently shaking and incubated at room temperature for 10 min. The precipitate was collected by centrifugation at 12,000 × g, 4 °C for 10 min, resuspended in pre-cooled 75% ethanol, and centrifuged again. The precipitate was air-dried and dissolved in 50 μL DEPC-treated water. RNA purity and concentration were measured. Total RNA was reverse-transcribed to cDNA. Real-time PCR was performed in triplicate with a SYBR Green Premix qPCR kit on the CFX96 Touch. Relative mRNA expression levels were calculated using 2-△△Ct method, with GAPDH as the internal reference.

**Statistical analysis**

Quantitative data are displayed as means ± SD. Statistical differences were determined using Student's t-test for two groups or one-way analysis of variance (ANOVA) for three or more groups. Statistical analyses were performed using GraphPad Prism 8. Statistical significance was denoted as *p < 0.05, **p < 0.01, ***p < 0.001, ****p < 0.0001.

**Supplementary Figures**


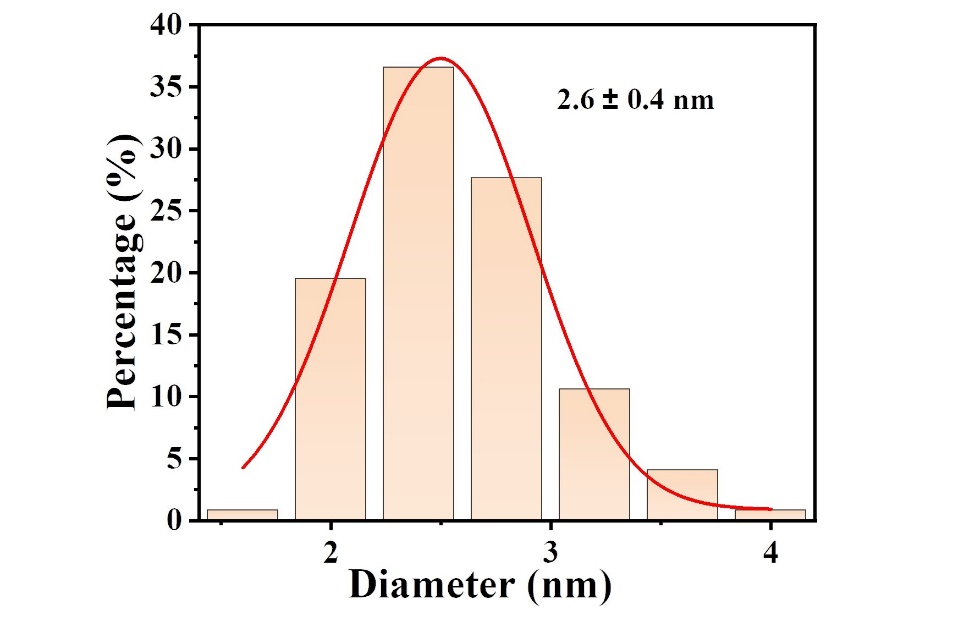


**Figure S1.** Histogram of particle size distribution of MgMn@CDs.


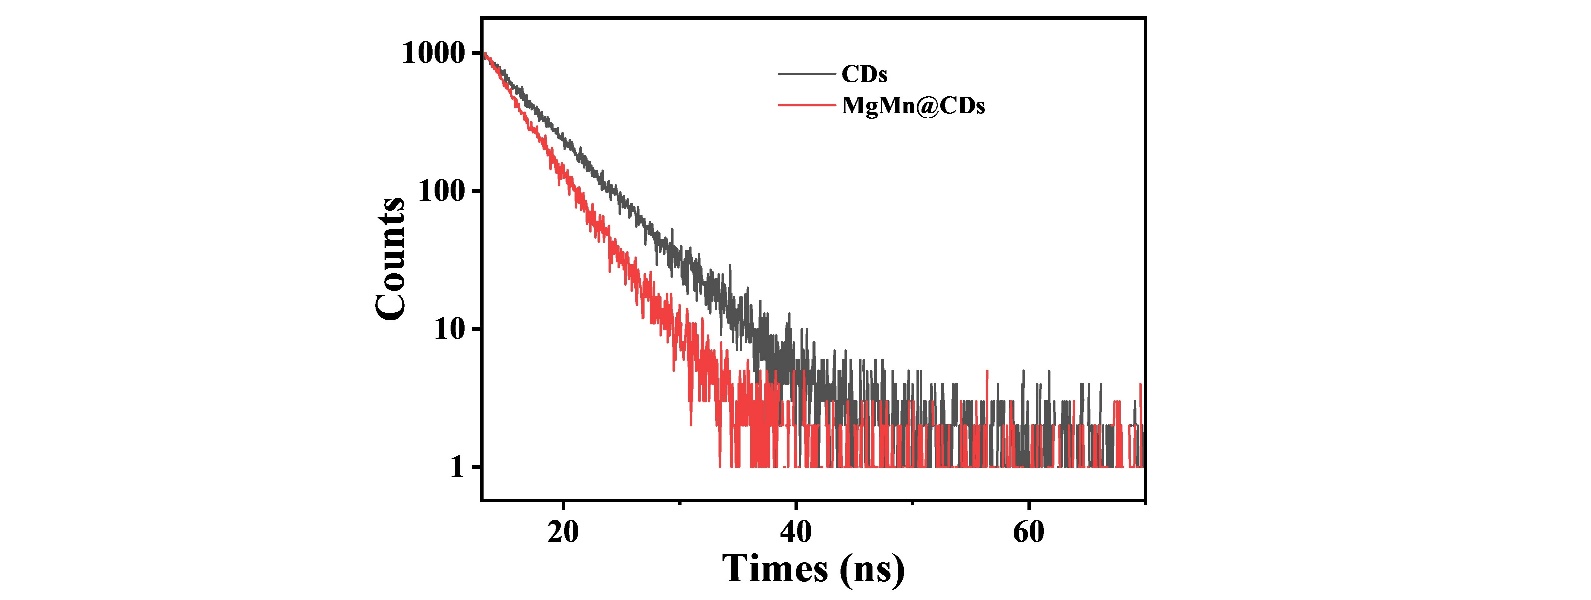


**Figure S2.** Fluorescence decay curves of CDs and MgMn@CDs.


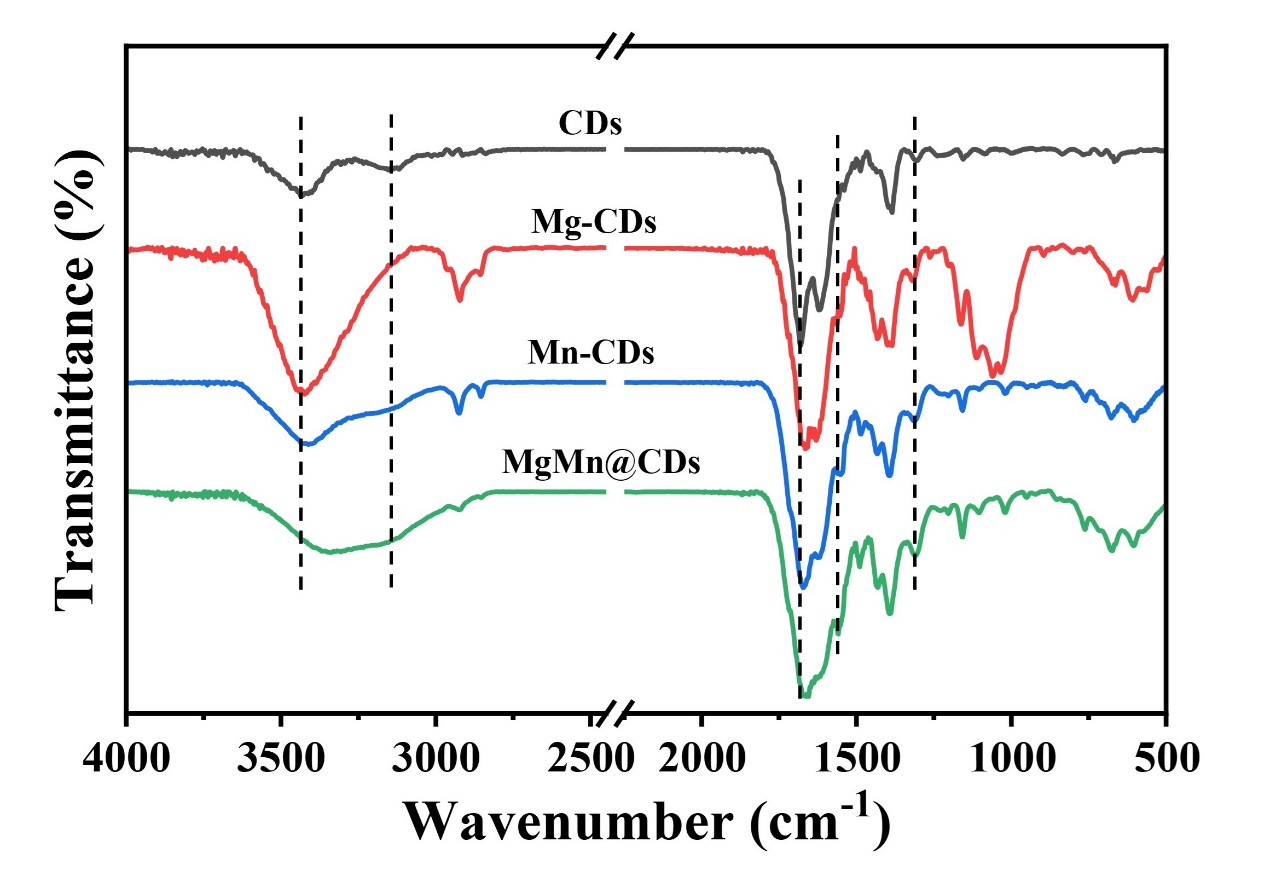


**Figure S3.** The FT-IR spectra of CDs, Mg-CDs, Mn-CDs, and MgMn@CDs.


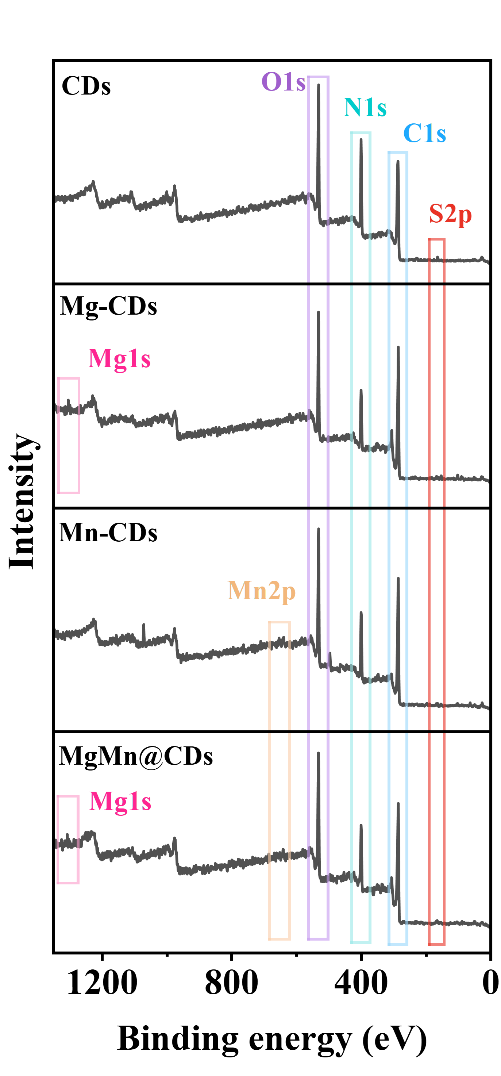


**Figure S4.** XPS survey spectra of CDs, Mg-CDs, Mn-CDs and MgMn@CDs.


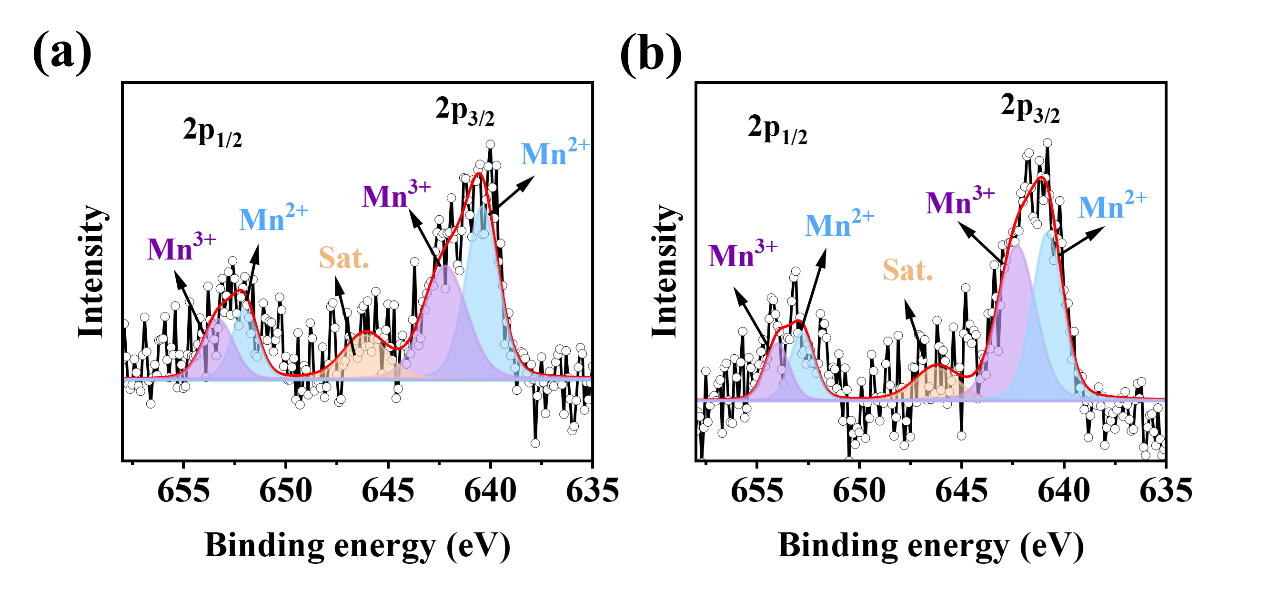


**Figure S5.** HR Mn 2p spectra of (a) Mn-CDs and (b) MgMn@CDs.


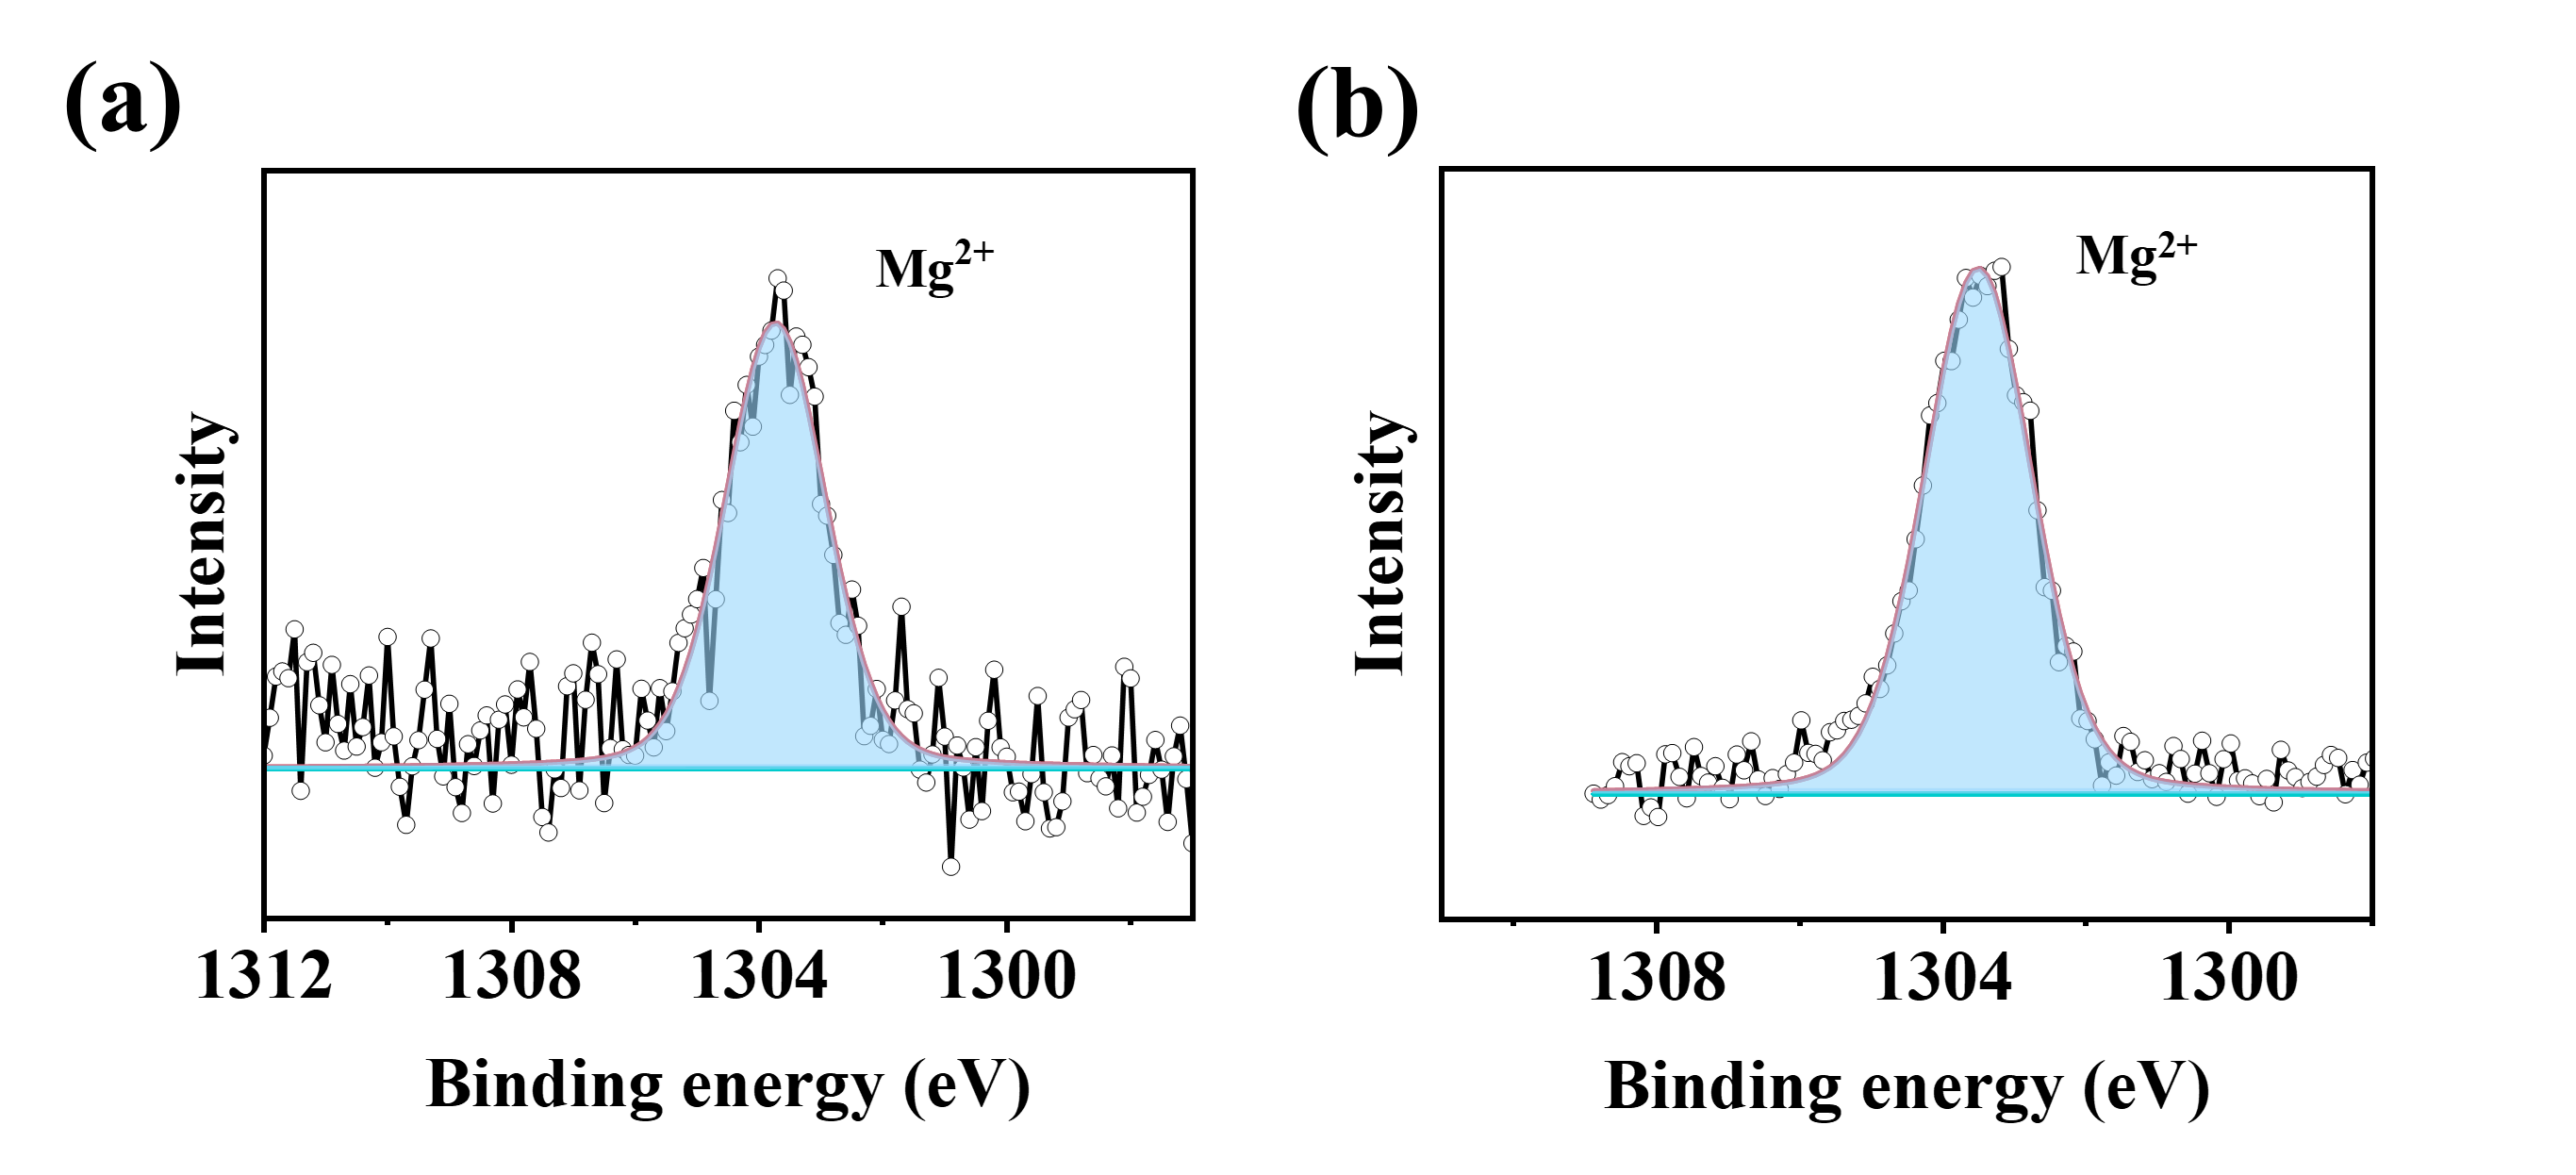


**Figure S6.** HR Mg 1s spectra of (a) Mg-CDs and (b) MgMn@CDs.


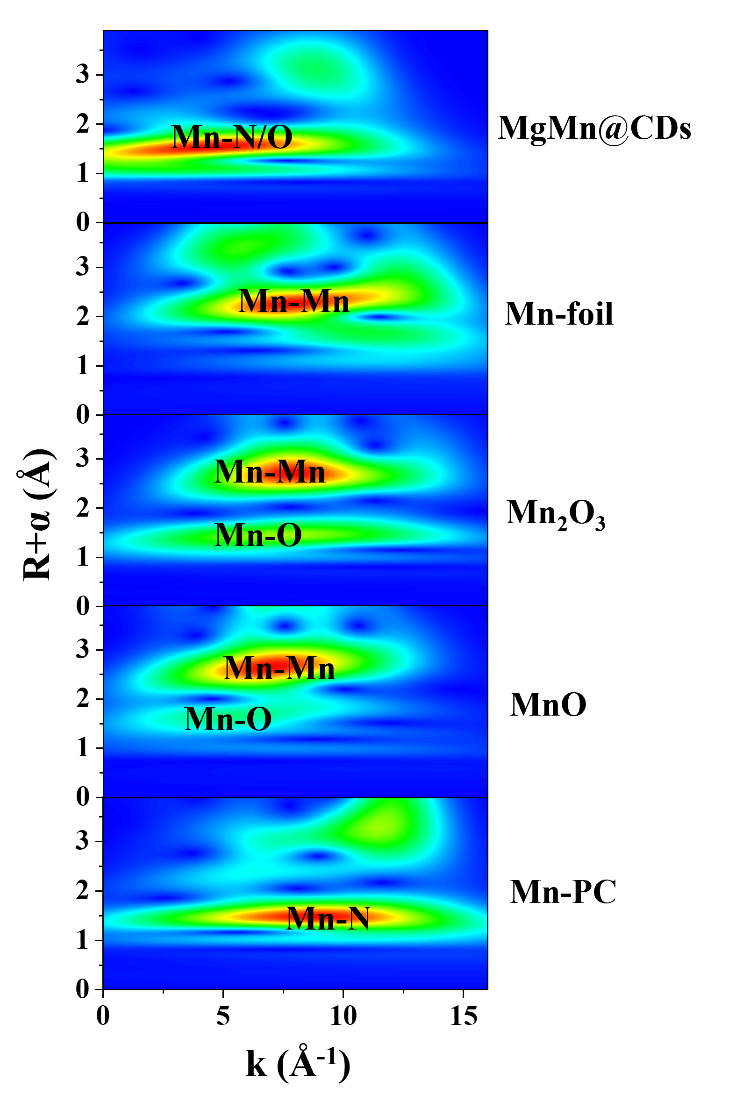


**Figure S7.** Mn K-edge WT-EXAFS curves of MgMn@CDs and reference samples.


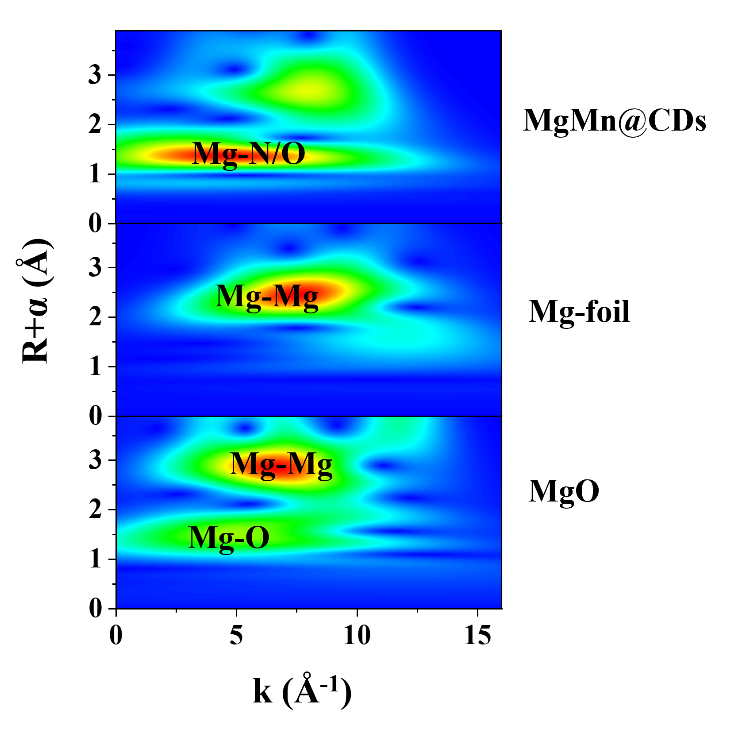


**Figure S8.** Mg K-edge WT-EXAFS curves of MgMn@CDs and reference samples.


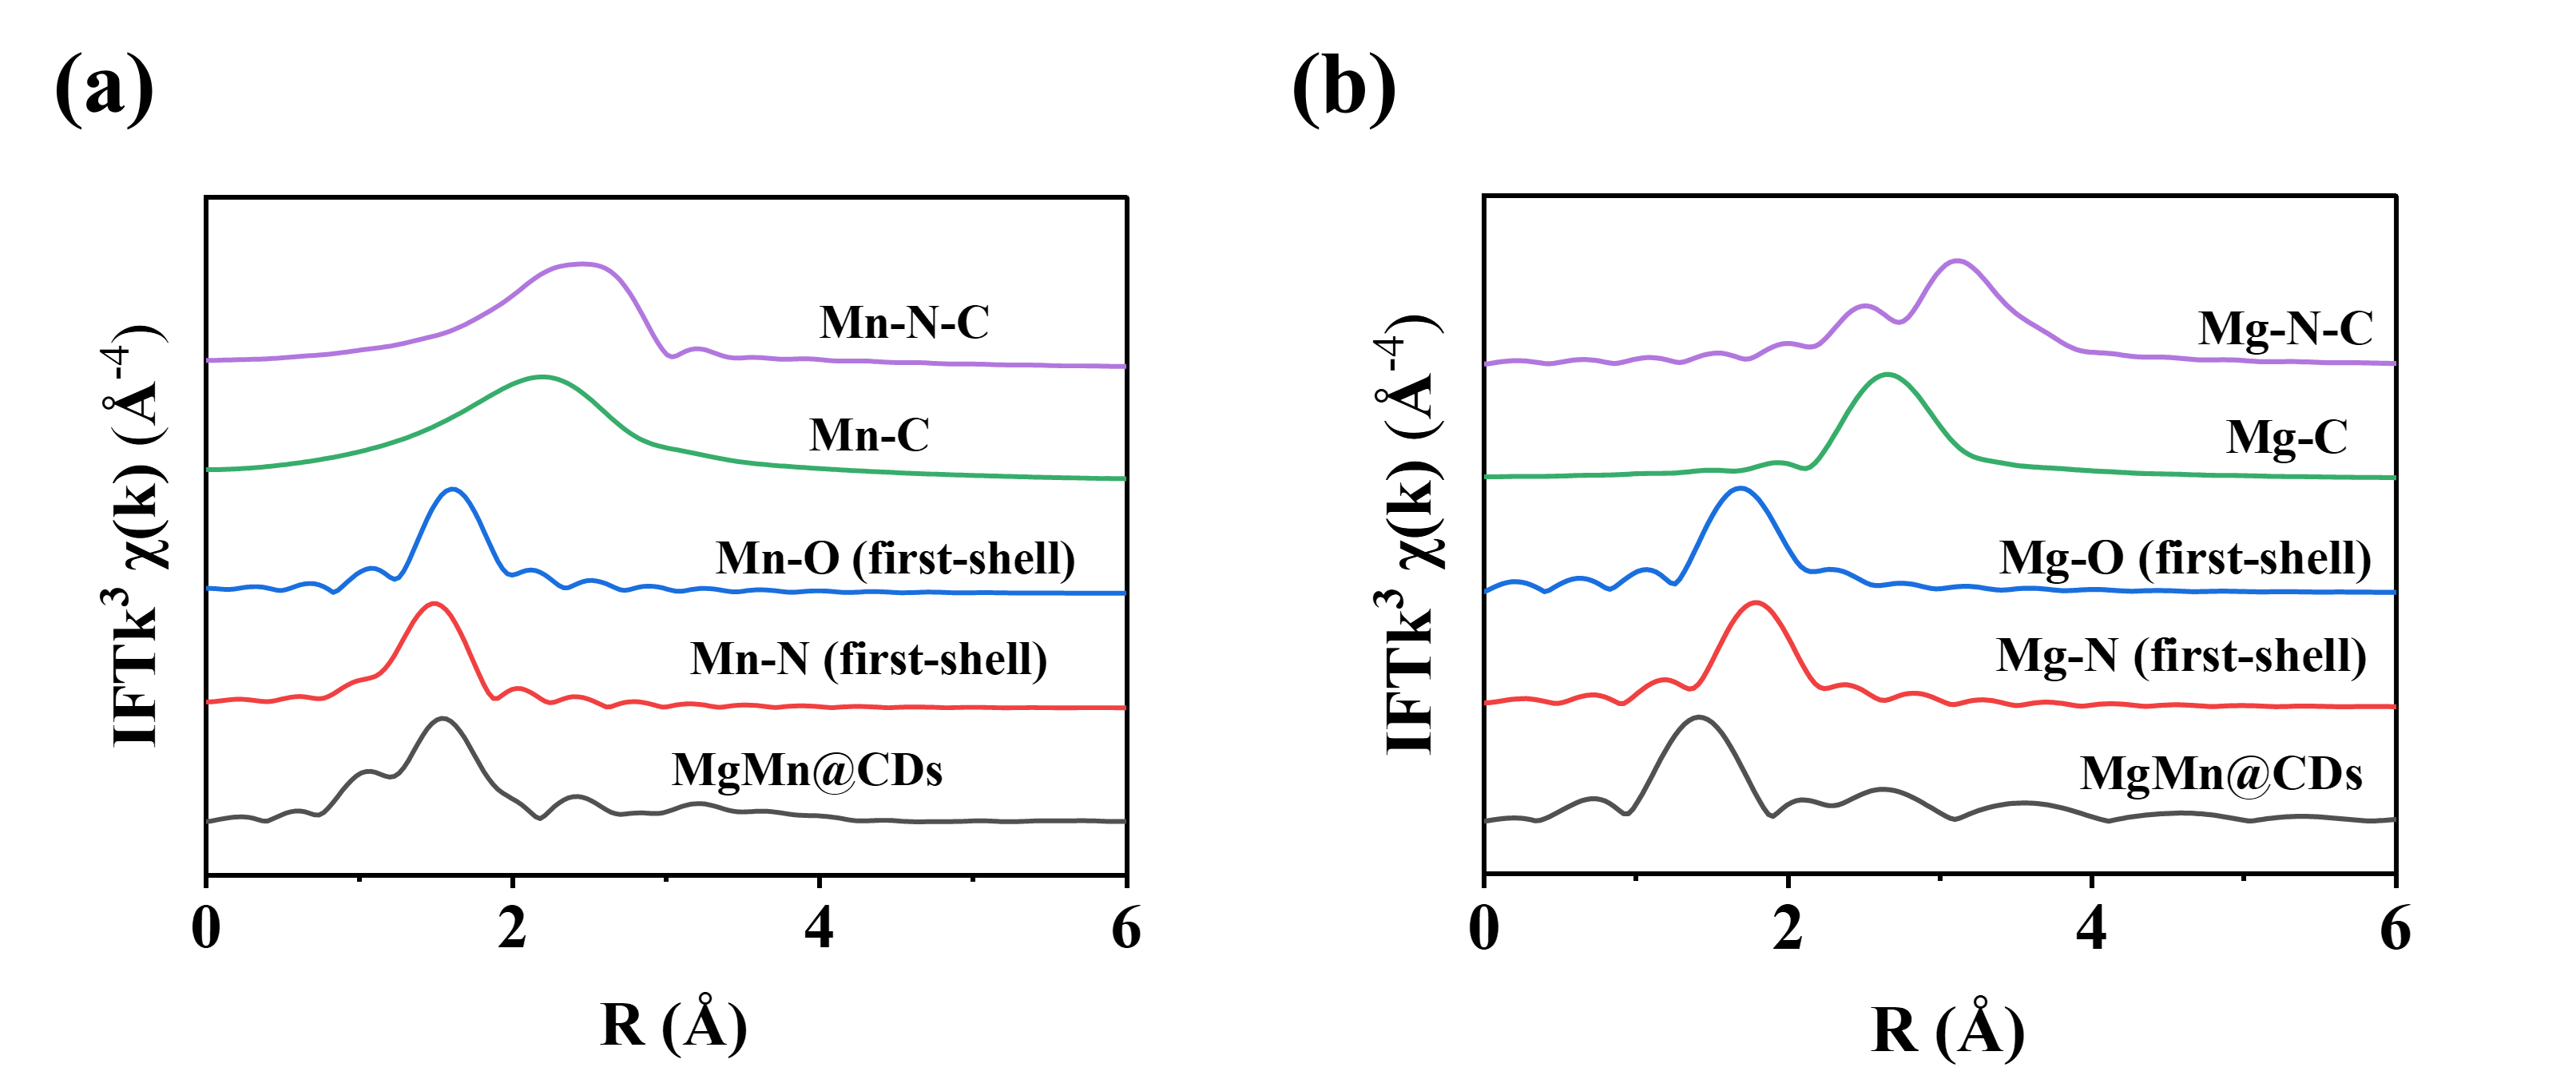


**Figure S9.** The (**a**) Mn and (**b**) Mg K-edge FT-EXAFS of MgMn@CDs with different scattering path.


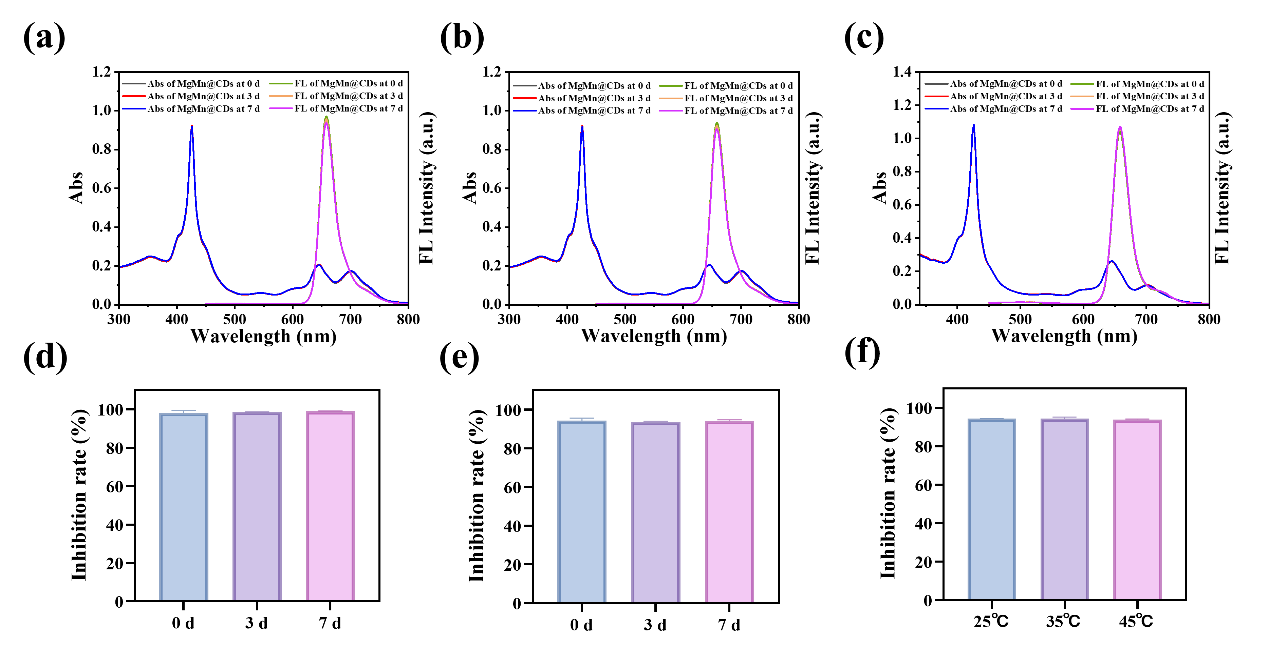


**Figure S10.** Stability of optical properties of MgMn@CDs after incubation in (a) water, (b) PBS, and (c) FBS for 0, 3, and 7 days (final concentration of 10 μg/mL). Stability of SOD-like activity of MgMn@CDs after incubation in (d) PBS and (e) FBS for 0, 3, and 7 days (final concentration of 0.65 μg/mL). (f) Stability of SOD-like activity of MgMn@CDs at 25 °C, 35 °C, and 45 °C (final concentration of 0.65 μg/mL).


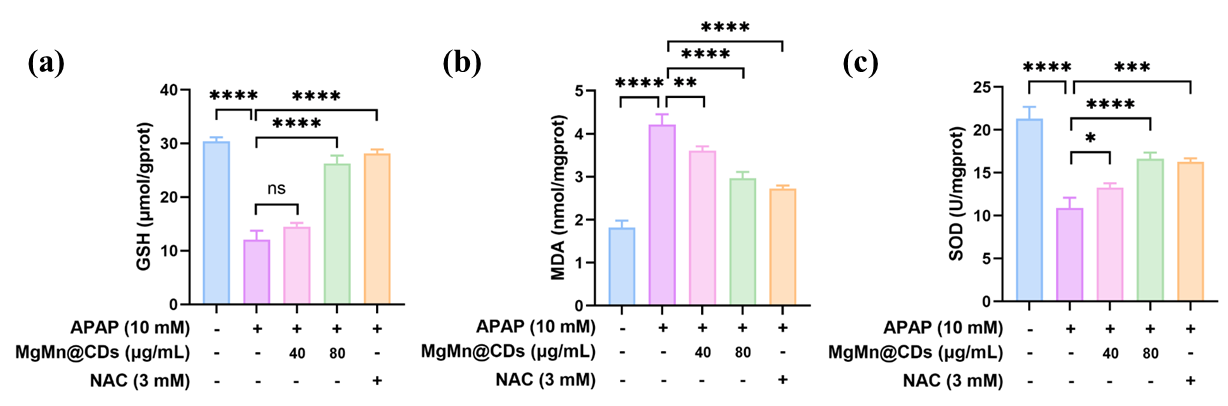


**Figure S11.** Levels of oxidative stress biomarkers: (**a**) GSH, (**b**) MDA and (**c**) SOD.


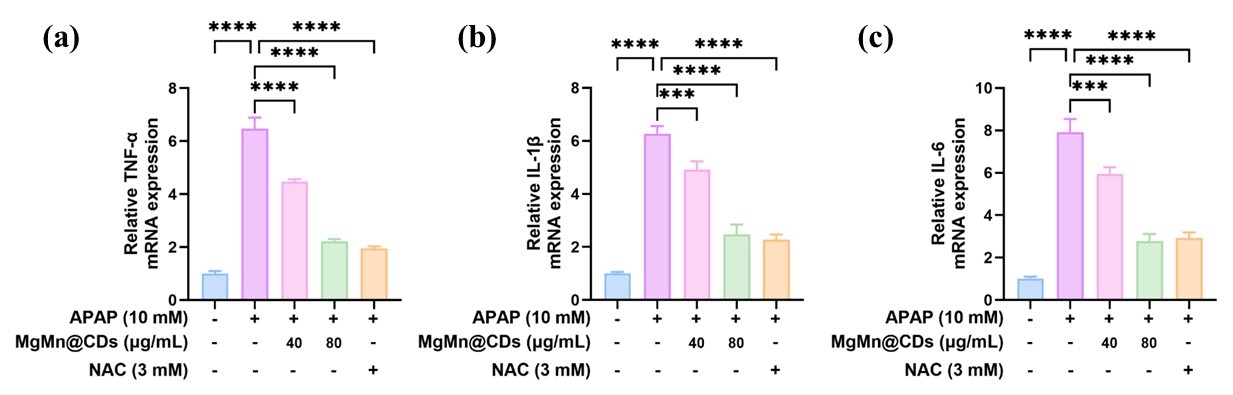


**Figure S12.** Levels of mRNA expression of key proinflammatory cytokines: (**a**) TNF-α, (**b**) IL-1β, and (**c**) IL-6.


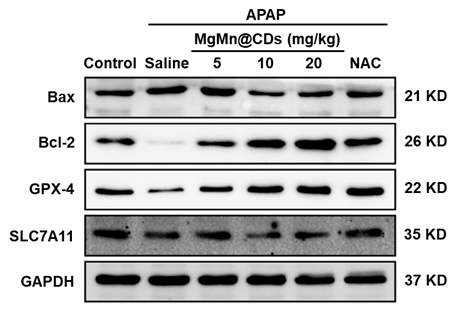


**Figure S13.** Protein expression levels of key regulatory markers for apoptosis (Bax and Bcl-2) and ferroptosis (GPX4 and SLC7A11).

**Supplementary Tables**

**Table. S1** Metal contents in Mg-CDs, Mn-CDs and MgMn@CDs

| Sample | Content of Mg (wt %) | Content of Mn (wt %) |
| --- | --- | --- |
| Mg-CDs | 2.66 | - |
| Mn-CDs | - | 2.40 |
| MgMn@CDs | 2.09 | 1.86 |

**Table. S2** Average fluorescence lifetime and absolute quantum yields of CDs and MgMn@CDs.

| Sample | average fluorescence lifetime（ns) | absolute quantum yield（QY, %） |
| --- | --- | --- |
| CDs | 4.73 | 21.9 |
| MgMn@CDs | 3.14 | 16.4 |

**Table. S3** Fitting parameters of Mn K-edge EXAFS spectra of MgMn@CDs.

| Shell | N | R (Å) | σ2 (10−2 Å2) | ΔE0 (eV) | r-factor |
| --- | --- | --- | --- | --- | --- |
| Mn-N/O | 3.18 | 1.94 | 0.48 | 0.0052 | 0.04926 |
| Mn-C | 7.26 | 2.98 | 0.44 |
| Mn-N/O-C | 11.21 | 3.16 | 1.01 |

**Table. S4** Fitting parameters of Mg K-edge EXAFS spectra of MgMn@CDs.

| Shell | N | R (Å) | σ2 (10−2 Å2) | ΔE0 (eV) | r-factor |
| --- | --- | --- | --- | --- | --- |
| Mg-N/O | 3.62 | 2.17 | 0.32 | 3.208 | 0.0228 |
| Mg-C | 2.41 | 2.96 | 1.13 |
| Mg-N-Mg | 6.86 | 3.64 | 0.52 |

S02 is the amplitude reduction factor for the absorber-backscatterer pair. N is the coordination number for the absorber-backscatterer pair. R is the average absorber-backscatterer distance. σ2 is the Debye-Waller factor. ΔE0 is the inner potential correction. The accuracies of the above parameters are estimated as N, ±20%; R, ±1%; σ2, ± 20%; ΔE0, ±20%. The data range used for data ﬁtting in k-space (Δk) and R-space (ΔR) are 3.0–10.0 Å−1 and 1.0–3.0 Å, respectively.

For Mn and Mg K-edge EXAFS spectra fitting, the S02 value are 0.92 and 0.90, respectively.

**Table. S5** Comparison of the SOD-like activity of MgMn@CDs with reported nanozymes.

| Nanozyme | Concentration  (μg/mL) | | | | Inhibition  rate (%) | | | Specific  Activity  (U/mg) | | Assay Kit | | Ref. | |
| --- | --- | --- | --- | --- | --- | --- | --- | --- | --- | --- | --- | --- | --- |
| CeO2@MMT | 20 | | | | ~60 | | | **/** | | WST-1 by  Dojindo | | 2 | |
| Cu-SAzyme | 50 | | | | ~100 | | | 448.22 | | WST-1 by  Dojindo | | 3 | |
| PEG-cOACs | | | 2.64 | | | ~50 | 3750 | | | | WST-1 by  Dojindo | 4 | | |
| C-dots | 10 | | | | ~100 | | | 7318 | | WST-1 by  Dojindo | | 5 | |
| Pero-Nanozysome | | 16.6 | | | 90 | | | | **/** | | WST-1 by  Dojindo | 6 |
| PtCD@NP | 5 | | | | ~80 | | | 7893 | | WST-1 by  Dojindo | | 7 | |
| Mg-CDs | 10.42 | | | | ~80 | | | ＞1000 | | WST-1 by  Dojindo | | 8 | |
| Cur@TB CD | | | | 10 | ~70 | | | **/** | | | WST-1 by  Dojindo | 9 | | | |
| Cur-Fe | 100 | | | | ~84 | | | 269 | | WST-1 by  Dojindo | | 10 | |
| C-dots | 20 | | | | ~95 | | | 3299 | | WST-1 by  Dojindo | | 11 | |
| Natural SOD | 2 | | | | ~80 | | | 6829 | | WST-1 by  Dojindo | | 12 | |
| MgMn@CDs | 0.65 | | | | ~90 | | | 20658 | | WST-1 by  Dojindo | | This work | |

**Table. S6** Primers used for qRT-PCR.

|  | Primer sequences |
| --- | --- |
| Mouse GAPDH | F:5’ TGT GTC CGT CGT GGA TCT GA 3’ |
| R:5’ TTG CTG TTG AAG TCG CAG GAG 3’ |
| Mouse TNF-α | F:5’ AGGCTGCCCCGACTACGT 3’ |
| R:5’ GACTTTCTCCTGGTATGAGATAGCAAA 3’ |
| Mouse IL-6 | F:5’ ACA AGT CGG AGG CTT AAT TAC ACA T 3’ |
| R:5’ TTG CCA TTG CAC AAC TCT TTT C 3’ |
| Mouse IL-1β | F:5’ TCG CTC AGG GTC ACA AGA AA 3’ |
| R:5’ CAT CAG AGG CAA GGA GGA AAA C 3’ |

**References**

1. Zhang, Y.; Shi, J.; Fang, X.; Li, J.; Fan, X.; Wang, K.; Gao, G.; Luo, F.; Xu, N.; Xia, Z.; Liu, C., Mg/Mn co-doped carbon dot nanozyme with high superoxide dismutase-like activity and fluorescence for transdermal therapy of atopic dermatitis. *Chem. Eng. J.* **2025**, *523*, 168610.

2. Zhao, S.; Li, Y.; Liu, Q.; Li, S.; Cheng, Y.; Cheng, C.; Sun, Z.; Du, Y.; Butch, C. J.; Wei, H., An Orally Administered CeO2@Montmorillonite Nanozyme Targets Inflammation for Inflammatory Bowel Disease Therapy. *Adv. Funct. Mater.* **2020**, *30* (45), 2004692.

3. Yang, J.; Zhang, R.; Zhao, H.; Qi, H.; Li, J.; Li, J. F.; Zhou, X.; Wang, A.; Fan, K.; Yan, X.; Zhang, T., Bioinspired copper single‐atom nanozyme as a superoxide dismutase‐like antioxidant for sepsis treatment. *Exploration* **2022**, *2* (4), 20210267.

4. McHugh, E. A.; Liopo, A. V.; Mendoza, K.; Robertson, C. S.; Wu, G.; Wang, Z.; Chen, W.; Beckham, J. L.; Derry, P. J.; Kent, T. A.; Tour, J. M., Oxidized Activated Charcoal Nanozymes: Synthesis, and Optimization for In Vitro and In Vivo Bioactivity for Traumatic Brain Injury. *Adv. Mater.* **2024**, *36* (10), 2211239.

5. Geng, H.; Chen, J.; Tu, K.; Tuo, H.; Wu, Q.; Guo, J.; Zhu, Q.; Zhang, Z.; Zhang, Y.; Huang, D.; Zhang, M.; Xu, Q., Carbon dot nanozymes as free radicals scavengers for the management of hepatic ischemia-reperfusion injury by regulating the liver inflammatory network and inhibiting apoptosis. *J. Nanobiotechnol.* **2023**, *21* (1), 500.

6. Xi, J.; Zhang, R.; Wang, L.; Xu, W.; Liang, Q.; Li, J.; Jiang, J.; Yang, Y.; Yan, X.; Fan, K.; Gao, L., A Nanozyme‐Based Artificial Peroxisome Ameliorates Hyperuricemia and Ischemic Stroke. *Adv. Funct. Mater.* **2020**, *31* (9), 2007130.

7. Yan, X.; Song, J.; Zhang, Y.; Yang, M.; Deng, Z.; Gao, B.; Zhu, Y.; Xu, C.; Ding, C.; Zhang, M.; Zhang, B., Platelet-inspired nanomedicine targeting activated neutrophils to alleviate ulcerative colitis by free radicals scavenging and controlled neutrophil swarming. *Nano Today* **2024**, *54*, 102139.

8. Shi, J.; Zhang, Y.; Fang, X.; Fan, X.; Li, J.; Zhou, C.-H.; Xia, Z.; Pang, D.-W.; Liu, C., Photoswitchable Antioxidant and Prooxidant Activities of Mg-Doped Carbon Dot Nanozymes as Antibacterial and Anti-Inflammatory Agents. *ACS Appl. Mater. Interfaces* **2025**. *17* (18), 26467-26479.

9. Yang, H.; Qiu, H.; Shan, J.; Nie, C.; Lin, Y.; Shen, Y.; Wang, X., Waste tobacco leaf-driven carbon dot nanozymes with high reactive oxygen species scavenging and anti-inflammatory activities for the amelioration of acute lung injury. *Ind. Crops Prod.* **2025**, *229*, 120958.

10. Zhu, Y.; Huang, X.; Deng, Z.; Bai, T.; Gao, B.; Xu, C.; Fu, J.; Zhao, Y.; Zhang, Y.; Zhang, M.; Zhang, M.; Yang, M.; Chen, L., Orally biomimetic metal-phenolic nanozyme with quadruple safeguards for intestinal homeostasis to ameliorate ulcerative colitis. *J. Nanobiotechnol.* **2024**, *22* (1), 545.

11. Zhang, M.; Liang, Y.; Zhang, Y.; Zhang, L.; Wang, N.; Zhou, Y.; Wang, Y.; Cui, M.; Yu, Z.; Zhang, M.; Ma, Y., Oral carbon dot nanozymes with red fluorescence and superoxide dismutase-like activity for colitis bioimaging and inflammation management. *Chem. Eng. J.* **2024**, *493*, 152842.

12. Gao, G.; Xia, H.; Shi, J.; Zheng, P.; Wu, W.; Wu, S.; Qi, T.; Song, H.; Gu, Y.; Li, J.; Lei, P.; Liu, C.; Wu, K., Carbon Dot Nanozymes with Ferrous Ion‐Chelating and Antioxidative Activity Inhibiting Ferroptosis to Alleviate Renal Ischemia‐Reperfusion Injury. *Small* **2025**, *21* (16), 2407372.
